# Supplementary material for: Effect of Water-Soluble Chlorine-Containing Buckminsterfullerene Derivative on the Metabolism of Reactive Oxygen Species in Human Embryonic Lung Fibroblasts
Source: MDPI journal article supplement (doi:10.3390/oxygen3010001), 2022-12-27
Supplement: s1 [file s1]

Archive with 1 entries (1 files):
- oxygen-2047725-supplementary.pdf
