# Supplementary material for: Effect of Water-Soluble Chlorine-Containing Buckminsterfullerene Derivative on the Metabolism of Reactive Oxygen Species in Human Embryonic Lung Fibroblasts
Source: MDPI journal article supplement (doi:10.3390/oxygen3010001), 2022-12-27
Supplement: s1 [file s1 › oxygen-2047725-supplementary.pdf]

# Effect of water-soluble chlorine-containing buckminsterfullerene derivative on the metabolism of reactive oxygen species in human embryonic lung fibroblasts

Ekaterina A. Savinova, Elizaveta S. Ershova, Elena V. Proskurnina, Ivan V. Rodionov, Olga A. Kraevaya, Pavel E. Troshin, Larisa V. Kameneva, Elena M. Malinovskaya, Olga A. Dolgikh, Natalia N. Veiko and Svetlana V. Kostyuk

## Synthesis of compound F1

Water-soluble fullerene derivative **F1** (scheme S1) was synthesized in three synthetic steps and characterized as reported before [1].

First, chlorofullerene  $C_{60}Cl_6$  obtained as described previously [2] was arylated with the excess of dimethyl ester of 3-phenylglutaric acid to obtain fullerene derivative **1** [1]. Compound **1** was purified using preparative HPLC, then ester groups in its structure were hydrolyzed to obtain fullerene-based acid **2** [1]. Synthesized acid was solubilized in water containing 2.5 eq of  $K_2CO_3$ . Obtained solution was filtered and then lyophilized to provide water-soluble salt **F1**.

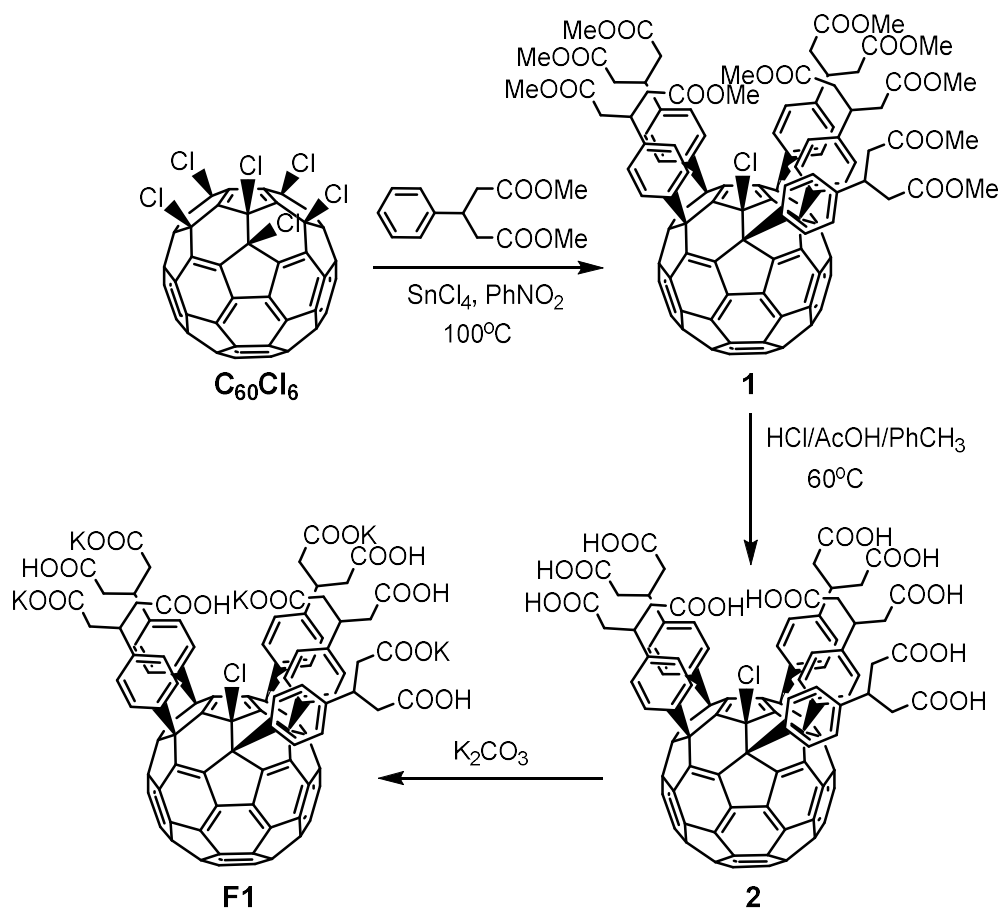

**Figure S1.** Synthesis of water-soluble fullerene derivative F1 from chlorofullerene  $C_{60}Cl_6$ .

### Dynamic light scattering measurements

As most of the amphiphilic fullerene derivatives, water-soluble compound F1 forms bilayer vesicles with average hydrodynamic radius  $\langle R_h \rangle = 50$  nm in aqueous solution.

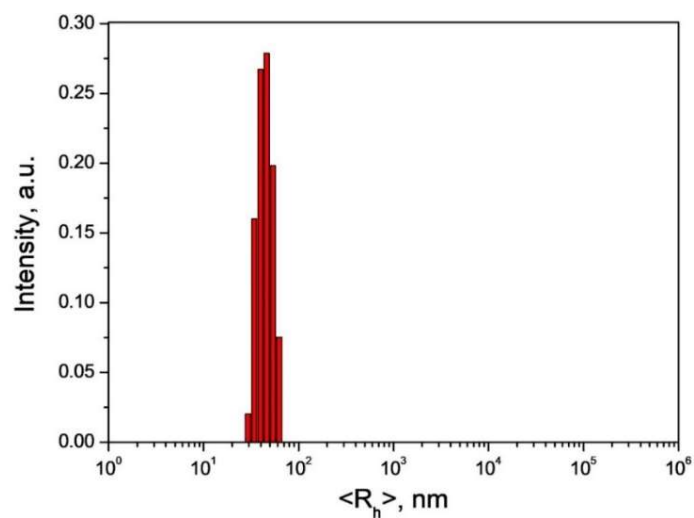

**Figure S2.** DLS profile revealing particle size distribution in aqueous solutions of the fullerene derivative F1.

### The fluorescence and absorption spectra of the fullerene derivative

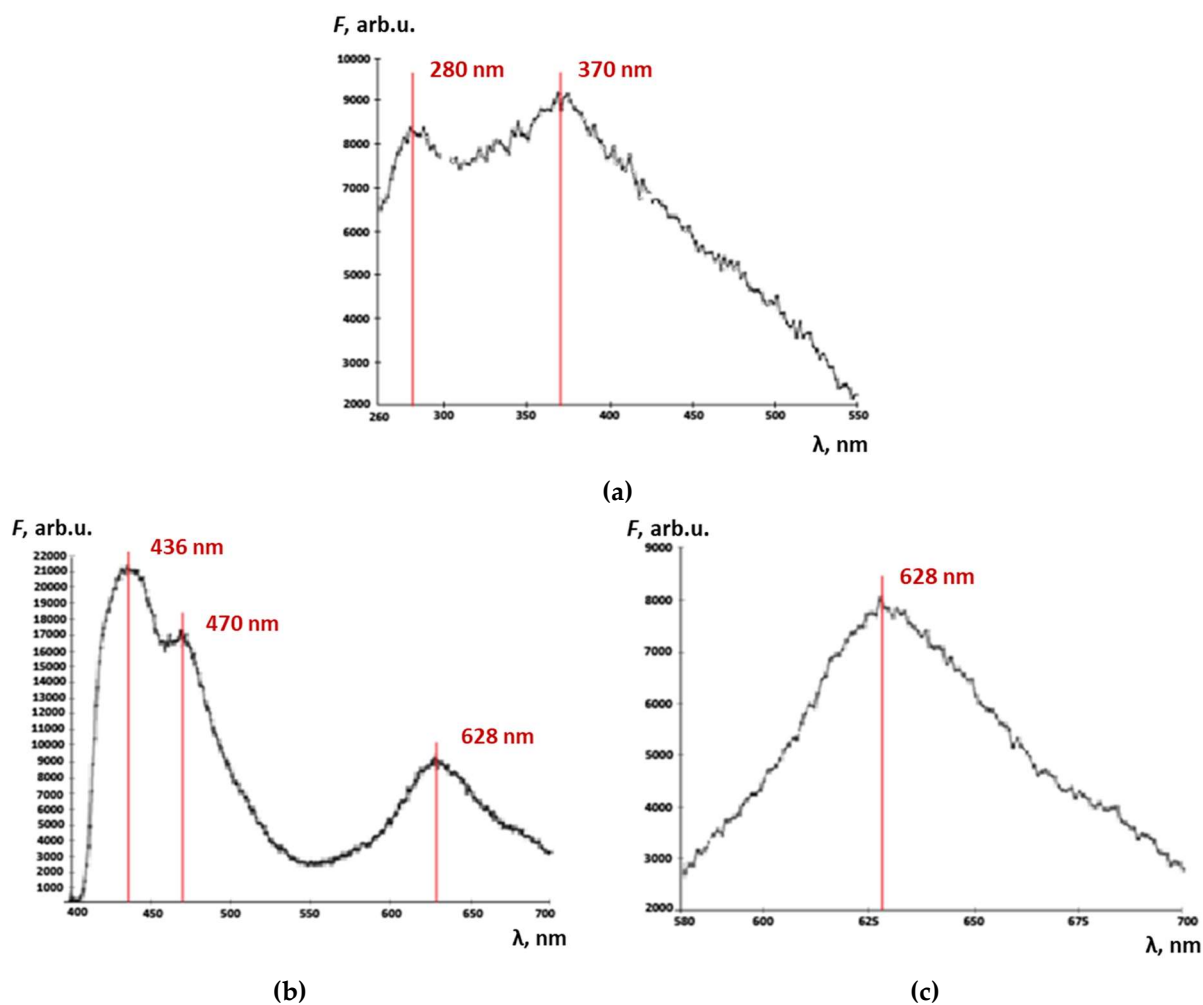

**Figure S3.** The excitation spectrum of the F1 solution in the culture medium (1.5  $\mu$ M) ( $\lambda_{fl} = 620$  nm) (a); the fluorescence spectra of F1 at  $\lambda_{ex} = 280$  nm (b) and  $\lambda_{ex} = 370$  nm (c).

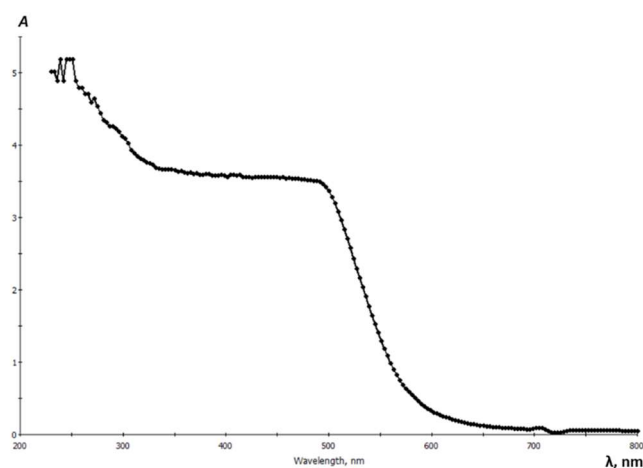

**Figure S4.** The absorption spectrum of the F1 solution in deionized water (1.5  $\mu\text{M}$ ).

#### MTT-test, the positive control with dimethyl sulfoxide

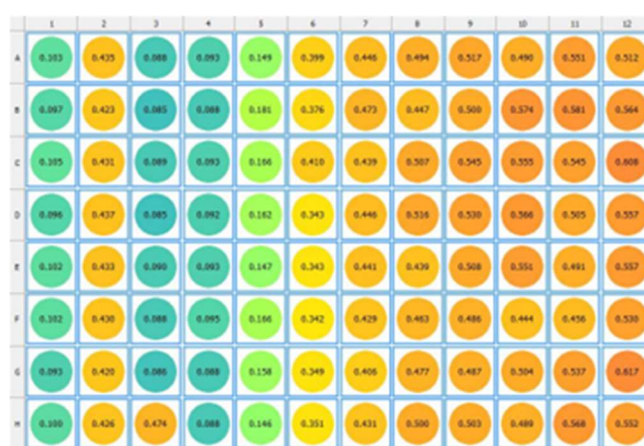

(a)

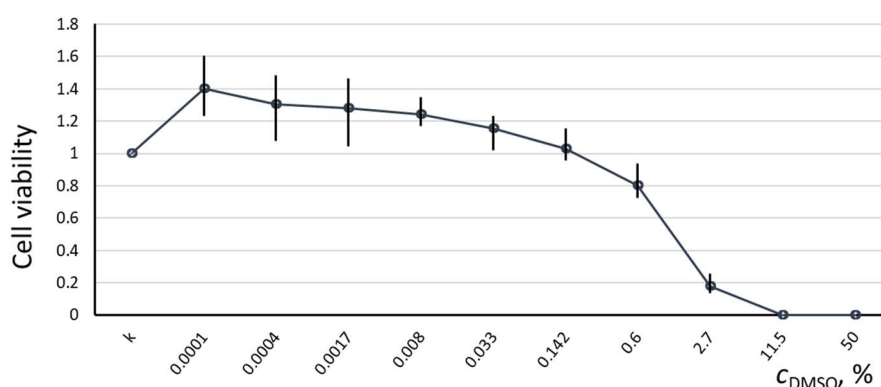

(b)

**Figure S5.** MTT-test: the positive control with dimethyl sulfoxide (0.0001%–50%); a 96-well scheme (a) and the cell viability vs DMSO concentration (b).

#### References

- 1 Kraevaya, O.A.; Peregodov, A.S.; Troyanov, S.I.; Godovikov, I.; Fedorova, N.E.; Klimova, R.R.; Sergeeva, V.A.; Kameneva, L.V.; Ershova, E.S.; Martynenko, V.M., et al. Diversion of the Arbuzov reaction: alkylation of C-Cl instead of phosphonic ester formation on the fullerene cage. *Org Biomol Chem* **2019**, 17, 7155-7160, doi:10.1039/c9ob00593e.
- 2 Troshin, P.A.; Popkov, O.; Lyubovskaya R.N. Some New Aspects of Chlorination of Fullerenes. *Fullerenes, Nanotubes, Carbon Nanostruct.* **2003**, 11, 165-185, doi: 10.1081/FST-120021142.
